# Supplementary material
Source: bioRxiv or medRxiv preprint supplement (http://biorxiv.org/highwire/filestream/48727/field_highwire_adjunct_files/0/163998-1.pdf)
Supplement: Supplementary file [file 163998-1.pdf]

**Interferon Regulatory Factor 5 (IRF5) Interacts with the Translation Initiation Complex and Promotes mRNA Translation During the Integrated Stress Response to Amino Acid Deprivation**

James D. Warner<sup>1,2</sup>, Mandi Wiley<sup>1</sup>, Ying-Y Wu<sup>1</sup>, Feng Wen<sup>1</sup>, Michael Kinter<sup>3</sup>, Akiko Yanagiya<sup>4</sup>, Kandice L. Tessner<sup>1</sup> and Patrick M. Gaffney<sup>1,2</sup>

**SUPPLEMENTAL INFORMATION**

Supplemental information consists of one table and six figures.

**Table S1. mRNA translation-related proteins co-immunoprecipitated with IRF5**

| <b>Accession No.</b> | <b>Protein Name</b>      | <b>Mascot Score</b> | <b>Coverage (%)</b> |
|----------------------|--------------------------|---------------------|---------------------|
| <b>4504445</b>       | HNRNP A1 (isoform a)     | 425                 | 22                  |
| <b>4504447</b>       | HNRNP A2/B1 (isoform A2) | 158, 484            | 7, 26               |
| <b>14043072</b>      | HNRNP A2/B1 (isoform B1) | 854                 | 38                  |
| <b>88963249</b>      | HNRNP A3 (isoform 1)     | 540                 | 25                  |
| <b>4758544</b>       | HNRNP C (isoform b)      | 403                 | 23                  |
| <b>14165435</b>      | HNRNP K (isoform b)      | 164, 495            | 5, 20               |
| <b>74136883</b>      | HNRNP U (isoform a)      | 426, 586            | 9, 16               |
| <b>14141161</b>      | HNRNP U (isoform b)      | 325                 | 7                   |
| <b>24234747</b>      | ILF2                     | 211                 | 6                   |
| <b>4826998</b>       | SFPQ                     | 388                 | 14                  |
| <b>15055539</b>      | RPS2                     | 296                 | 24                  |
| <b>15718687</b>      | RPS3                     | 409                 | 29                  |
| <b>4506725</b>       | RPS4X                    | 731                 | 41                  |
| <b>4503471</b>       | EEF1 $\alpha$ 1          | 363, 457, 527       | 17, 20, 21          |
| <b>4503475</b>       | EEF1 $\alpha$ 2          | 257, 258, 291       | 11, 11, 11          |
| <b>25453474</b>      | EEF1 $\delta$            | 140                 | 7                   |
| <b>4503483</b>       | EEF2                     | 345                 | 10                  |
| <b>4758138</b>       | DDX5                     | 218                 | 5                   |
| <b>100913206</b>     | DHX9                     | 452                 | 7                   |
| <b>4503529</b>       | EIF4A1                   | 282                 | 12                  |

Combined data from n=3 independent experiments. Abbreviations: HNRNP=heterogeneous nuclear ribonucleoprotein; ILF=interleukin enhancer-binding factor; SFPQ=splicing factor, proline- and glutamine-rich; RPS=ribosomal protein S; EEF=eukaryotic elongation factor; DDX=DEAD-box; DHX=DEAH-box; EIF=eukaryotic initiation factor

**Figure S1.**

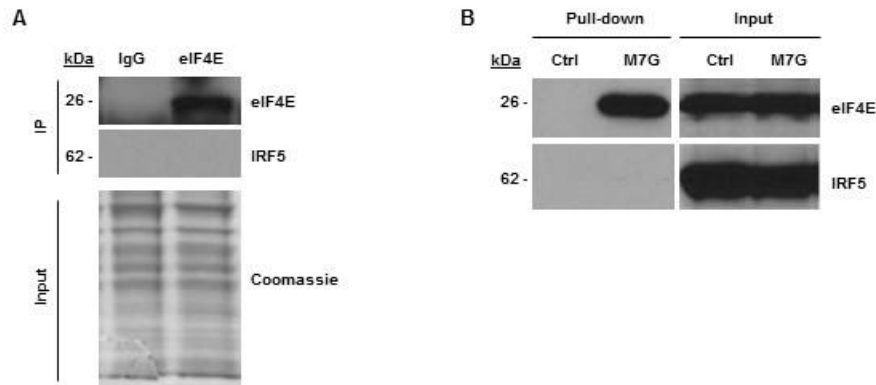

**Figure S1. IRF5 does not interact with the m<sup>7</sup>GTP cap-binding protein, eIF4E.** **A**, Endogenous eIF4E was immunoprecipitated from BJAB cell lysates previously fixed with 1% formaldehyde and analyzed by immunoblotting for IRF5 co-immunoprecipitation. Results are representative of n=3 independent experiments. **B**, Cell lysates were subjected to m<sup>7</sup>GTP sepharose pull-down, and analyzed by immunoblotting as indicated. Results are representative of n=3 independent experiments

**Figure S2.**

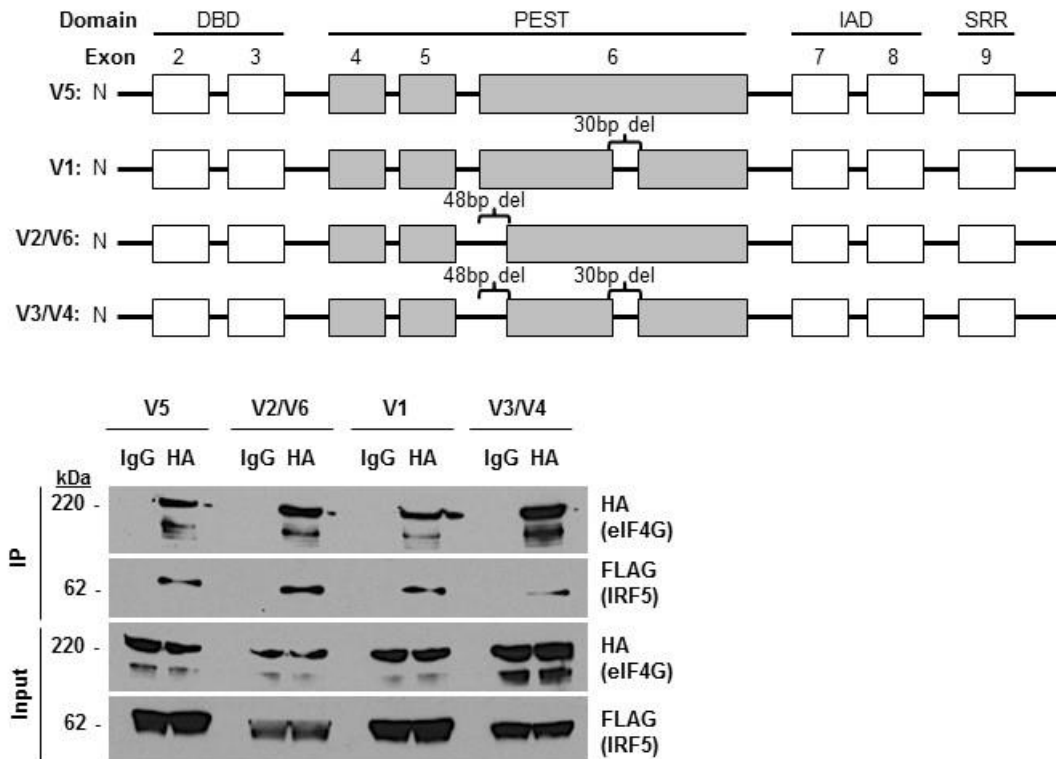

**Figure S2. eIF4G interaction is unaffected by structural variability within IRF5 exon 6.** **A**, Diagram representing the coding-variants in exon 6 that affect IRF5 protein structure. **B**, HEK293T cells were co-transfected with HA-tagged eIF4G and indicated FLAG-tagged IRF5 isoforms. FLAG-IRF5 isoforms were co-immunoprecipitated with HA-eIF4G and analyzed by immunoblotting. Results are representative of n=3 independent experiments.

**Figure S3.**

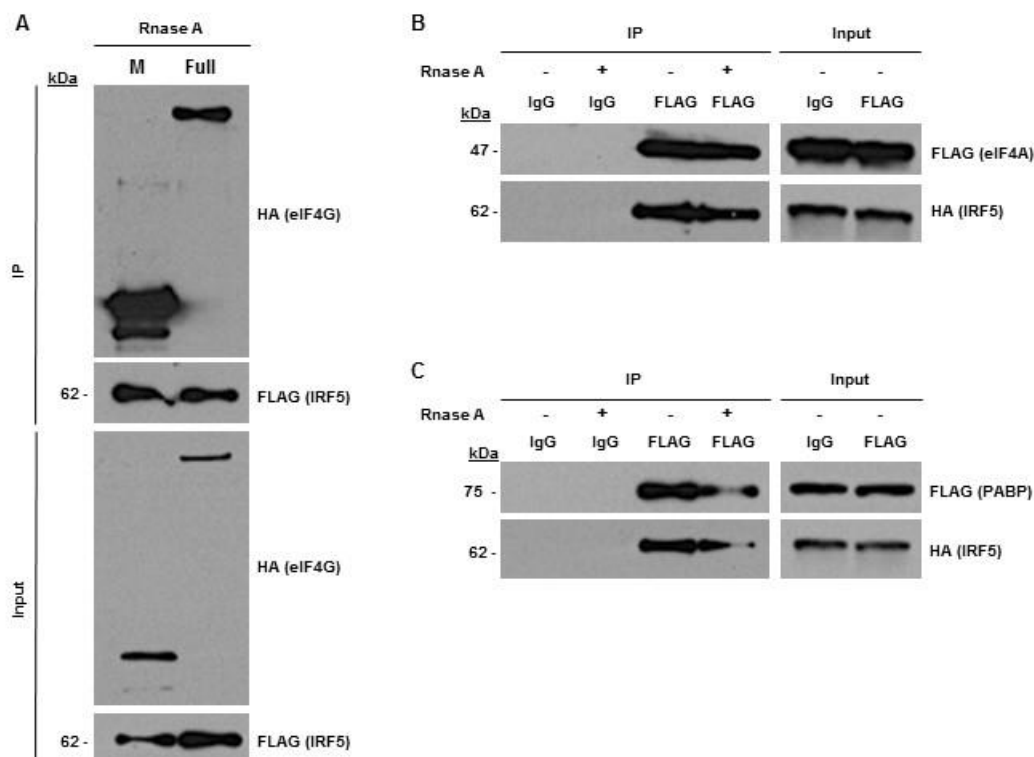

**Figure S3. IRF5-TIC interaction is not RNA-dependent.** **A**, HEK293T cells were co-transfected with FLAG-tagged IRF5 (V5) and HA-tagged full-length eIF4G or HA-tagged eIF4G mutant containing the MIF4G domain. Full-length HA-eIF4G or HA-MIF4G fragment was co-immunoprecipitated with FLAG-IRF5 (V5) as indicated. Individual immunoprecipitation reactions were divided equally and incubated with or without 10  $\mu$ g/mL RNase A at 37°C for 10 min prior to elution. **B** and **C**, HEK293T were co-transfected with HA-IRF5 (V5) and FLAG-eIF4A (B) or FLAG-PABP (C). FLAG-eIF4A (B) or FLAG-PABP (C) were then immunoprecipitated as indicated. Individual immunoprecipitation reactions were divided equally and incubated with or without 10  $\mu$ g/mL RNase A at 37°C for 10 min prior to elution. Immunoblotting was performed as indicated. (A-C) All results are representative of n=3 independent experiments.

**Figure S4.**

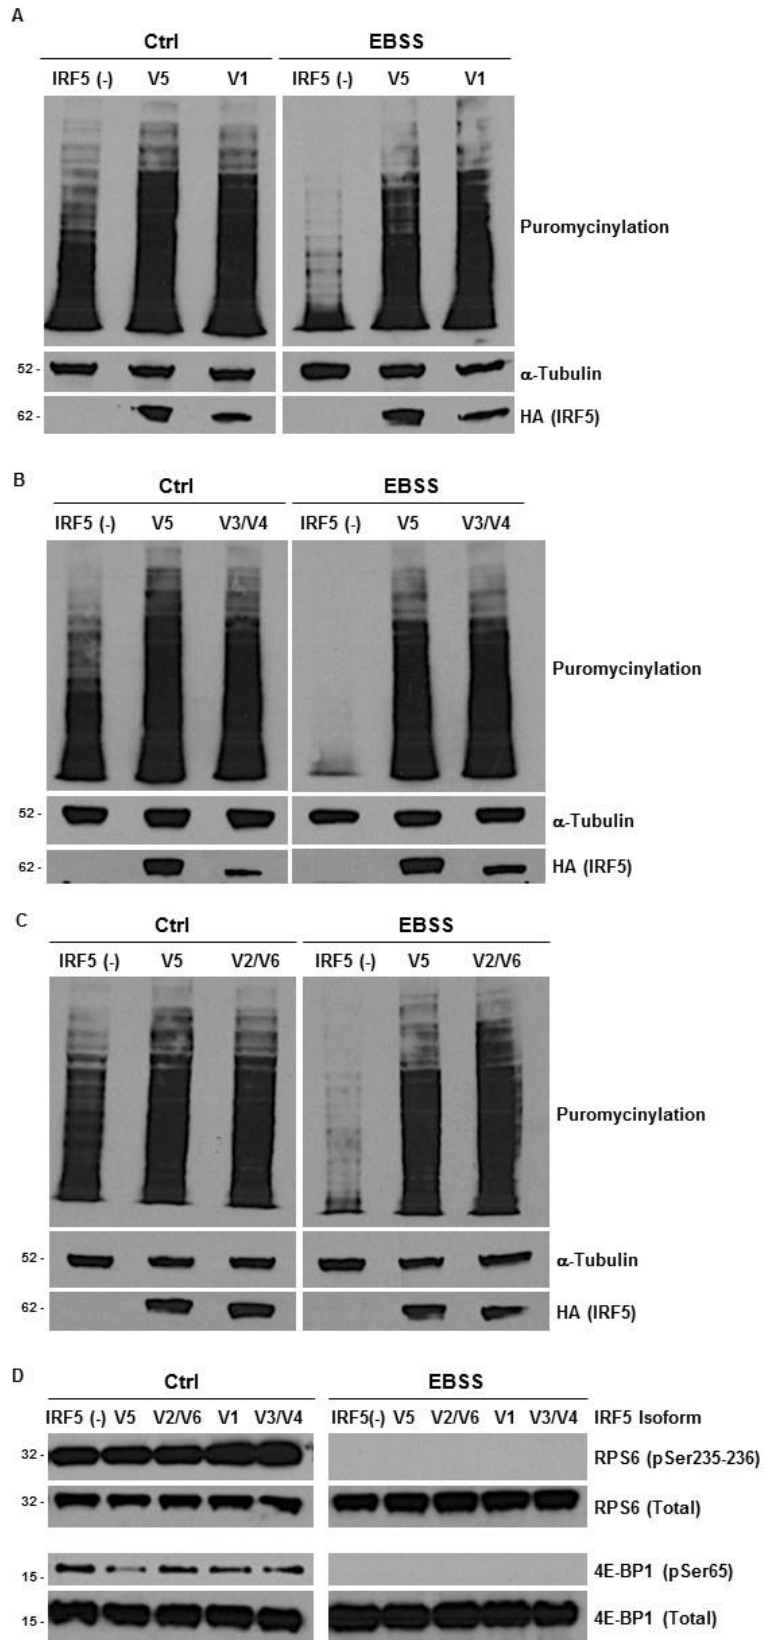

**Figure S4. IRF5 isoforms increase mRNA translation rates independently of mTOR activity.** A-C, IRF5(-) MEFs, and MEFs expressing HA-tagged IRF5 V5 (A-C), HA-tagged IRF5 V1 (A), V3/V4 (B) or V2/V6 (C) were incubated in Complete Media or EBSS for 2 h. MEFs were incubated with puromycin (100 µg/mL) for 1h prior to harvest and then subjected to immunoblotting with anti-puromycin antibody. (D) IRF5 (-) and MEFs expressing indicated HA-tagged IRF5 variants were incubated in Ctrl or EBSS medium for 2 h then analyzed by immunoblotting as indicated. (A-D) All results are representative of n<sub>≥</sub>2 independent experiments.

**Figure S5.**

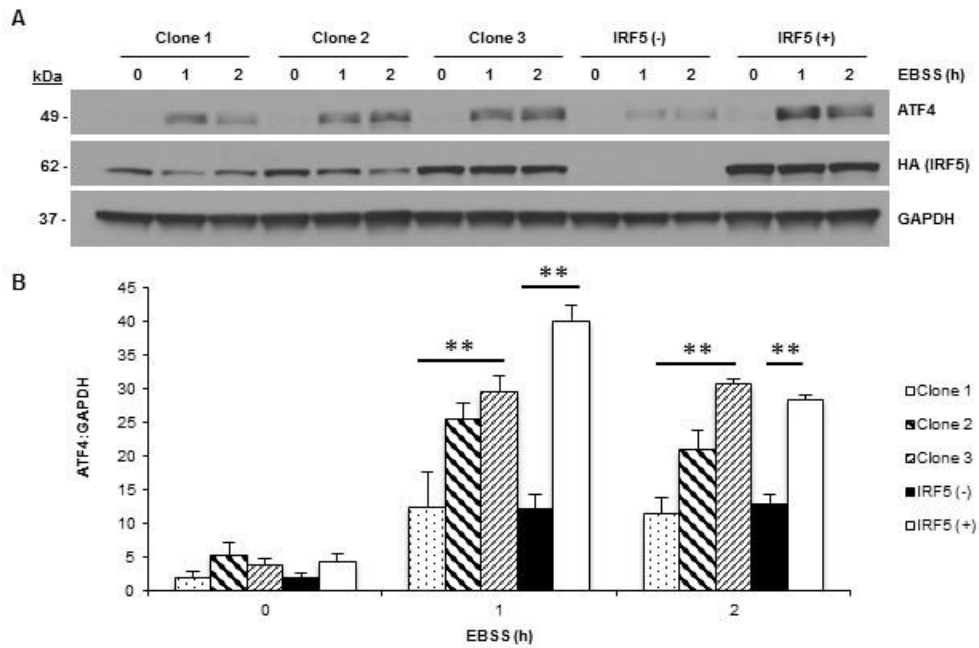

**Figure S5. IRF5 and ATF4 expression are positively correlated.** A and B, IRF5(-) MEFs and multiple IRF5(+) MEF clones each expressing different levels of IRF5 were incubated in EBSS as indicated and then subjected to immunoblotting (A). Quantitative analysis of data shown in A. Data is from n=3 independent experiments and is expressed as the ATF4-to-GAPDH ratio (B).

**Figure S6.**

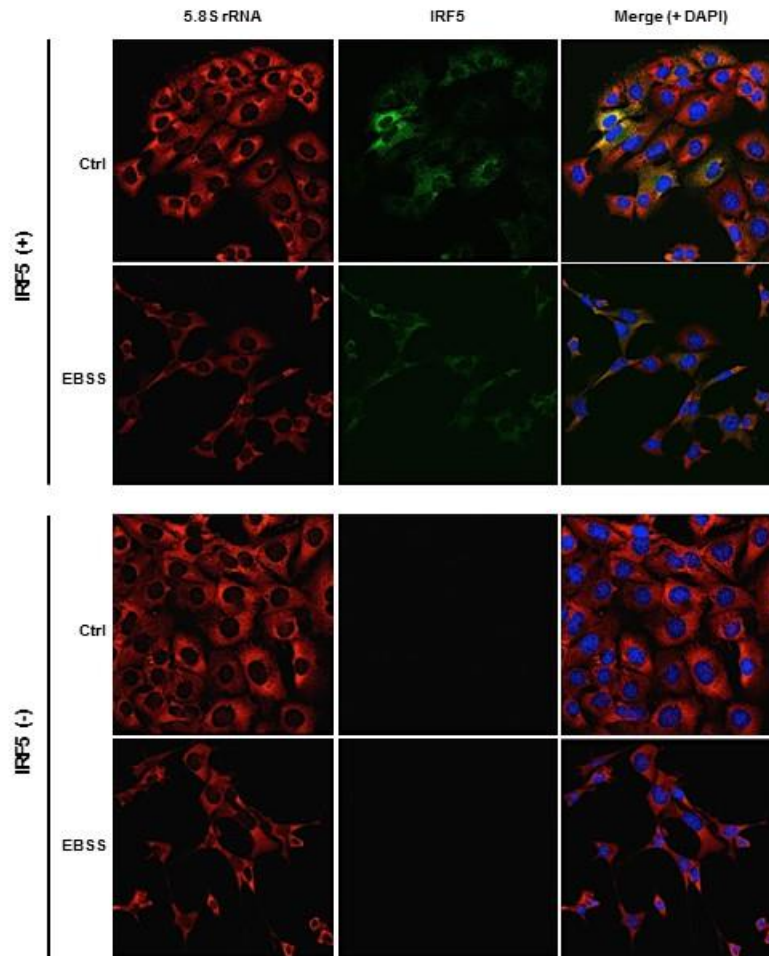

**Figure S6. IRF5 remains localized within the cytoplasmic compartment following culture in EBSS.** IRF5(-) and IRF5(+) MEFs were incubated in Culture Media or EBSS for 2 h and then subjected to immunofluorescence staining with 5.8S rRNA antibody (red), HA antibody (green), and DAPI (blue). Results are representative n=3 independent experiments.
